# Supplementary material for: The Two Faces of Janus: Why Thyrotropin as a Cardiovascular Risk Factor May Be an Ambiguous Target
Source: Front Endocrinol (Lausanne). 2020 Oct 26;11:542710. doi: 10.3389/fendo.2020.542710 (PMC7649136; doi:10.3389/fendo.2020.542710)
Supplement: Supplementary file 5 [file DataSheet_5.csv]

author	year	Ne	Me	Se	Nc	Mc	Sc	UoM	Cause	Comment	Design	Min. Interval	NOS
Goenjian et al.	2003	33	2,1	0,7	31	1,6	0,5	mIU/L	earthquake	NA	C	78	9,00
Loo et al.	2013	120	0,43	0,07	100	0,59	0,19	mIU/L	cancer	NA	C	12	7,00
Karlovic et al.	2004	43	1,3	0,6	39	1,2	0,5	mIU/L	combat	NA	C	60	7,00
Kozaric-Kovacic et al.	2002	38	1,19	0,76	32	1,09	0,63	mIU/L	combat	NA	C	43	9,00
Bauer et al.	1994	12	0,83	0,38	20	1,21	0,6	mIU/L	flight	NA	C	1	4,00
Mason et al.	1996	11	1,83	1,35	11	2,28	1,6	mIU/L	combat	NA	C	120	9,00
Kamoi et al.	2006	69	3,67	6,88	69	1,66	1,04	mIU/L	earthquake	Euthyroid Graves' disease	L	12	8,00
Olff et al.	2006	39	1,9	2	44	2	1,7	mIU/L	heterogeneous	unadjusted	C	12	8,00
Bunevicius et al.	2012	18	2,1	1,15	34	1,63	0,74	mIU/L	sexual abuse	NA	C	120	8,00
Friedman et al.	2005	63	1,45	0,72	42	1,76	0,9	mIU/L	sexual abuse	NA	C	24	5,00
Morgan et al.	2000	72	2,46	12	72	1,64	0,69	mIU/L	military training	NA	L	0	8,00
Mason et al.	1994	96	1,84	0,08	24	1,75	0,14	mIU/L	combat	NA	C	240	7,00
Wang et al.	1999	12	2,21	0,41	18	1,45	0,29	mIU/L	combat	NA	C	540	7,00
Kosten et al.	1990	11	3,4	0,9	28	3	1	mIU/L	unspecified	Interval not reported	C	NA	6,00
Sinai et al.	2014	49	1,4	0,7	43	1,3	0,7	mIU/L	interpersonal violence in childhood	NA	C	48	6,00
