# Supplementary material for: The Two Faces of Janus: Why Thyrotropin as a Cardiovascular Risk Factor May Be an Ambiguous Target
Source: Front Endocrinol (Lausanne). 2020 Oct 26;11:542710. doi: 10.3389/fendo.2020.542710 (PMC7649136; doi:10.3389/fendo.2020.542710)
Supplement: Supplementary file 8 [file DataSheet_8.csv]

author	year	Ne	Me	Se	Nc	Mc	Sc	UoM	Cause	Comment	Design	Min. Interval	NOS
Loo et al.	2013	120	194,37	19,15	100	102,43	18,38	nmol/L	cancer	NA	C	12	7
Karlovic et al.	2004	43	88,2	18,3	39	90,5	25,9	nmol/L	combat	NA	C	60	7
Kozaric-Kovacic et al.	2002	38	89	20,11	32	91,92	26,2	nmol/L	combat	NA	C	43	9
Sabioncello et al.	2000	15	123,53	16,68	14	115,57	15,02	nmol/L	combat	NA	C		7
Bauer et al.	1994	12	58,17	11,45	20	94,08	15,44	nmol/L	flight	NA	C	1	4
Mason et al.	1996	11	121,88	15,44	11	111,2	18,92	nmol/L	combat	NA	C	120	9
Bunevicius et al.	2012	18	99,49	17,63	34	96,4	15,57	nmol/L	sexual abuse	NA	C	120	8
Friedman et al.	2005	63	106,05	20,19	42	106,05	19,18	nmol/L	sexual abuse	NA	C	24	5
Morgan et al.	2000	72	97,81	15,44	72	102,96	18,02	nmol/L	military training	NA	L	0	8
Mason et al.	1994	96	110	2,4	24	87	3,6	nmol/L	combat	NA	C	240	7
Wang et al.	1999	12	106,82	4,38	18	108,11	4,89	nmol/L	combat	NA	C	540	7
Kosten et al.	1990	11	110,68	25,74	28	100,39	16,73	nmol/L	unspecified	Interval not reported	C	NA	6
Sinai et al.	2014	45	104	20	39	102	16	nmol/L	interpersonal violence in childhood	NA	C	48	6
